# Supplementary material for: Fluffy-ball-shaped carbon nanotube–TiO2 nanorod nanocomposites for photocatalytic degradation of methylene blue
Source: Royal Society of Chemistry journal article supplement (doi:10.1039/c5ra05641a), 2015-01-01
Supplement: c5ra05641a1.pdf [file c5ra05641a1.pdf]

## Supporting Information

# Fluffy-ball-shaped Carbon Nanotube-TiO<sub>2</sub> Nanorod Nanocomposites for Photocatalytic Degradation of Methylene Blue

*Zhisong Lu<sup>a,b,c\*</sup>, Xiutao Xiang<sup>a,b,c</sup>, Long Zou<sup>a,b,c</sup> and Jiale Xie<sup>a,b,c</sup>*

<sup>a</sup> Chongqing Key Laboratory for Advanced Materials & Technologies of Clean Energies,  
Southwest University, 1 Tiansheng Road, Chongqing 400715, P. R. China

<sup>b</sup> Institute for Clean Energy & Advanced Materials, Southwest University, 1 Tiansheng  
Road, Chongqing 400715, P. R. China

<sup>c</sup> Faculty of Materials & Energy, Southwest University, 1 Tiansheng Road, Chongqing  
400715, P. R. China

\*Corresponding author: Tel.: +86 23 68254732; Fax: +86 23 68254969. E-mail:  
zslu@swu.edu.cn.

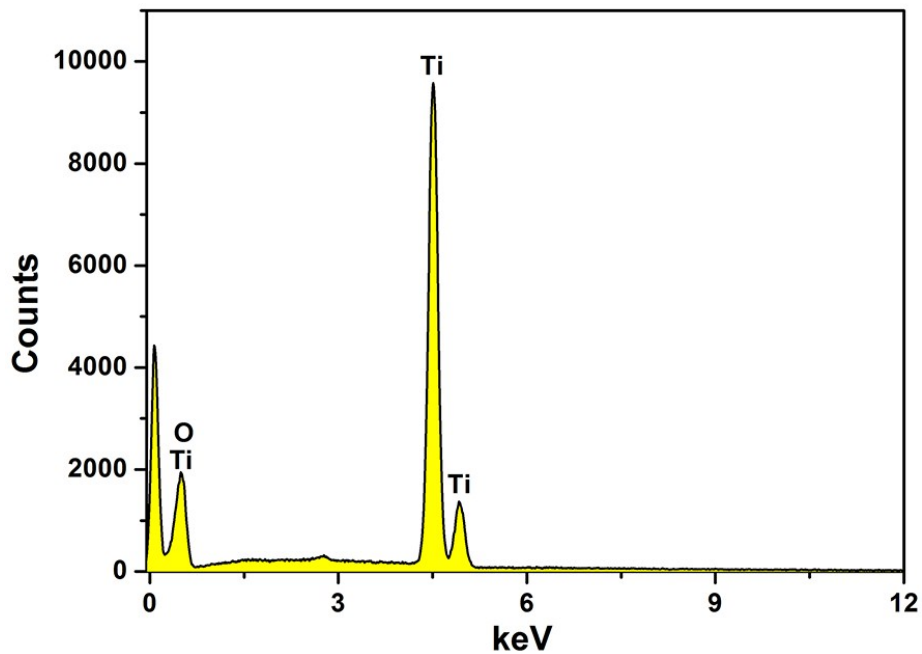

**Figure S1.** EDS of the  $\text{TiO}_2$  microspheres.

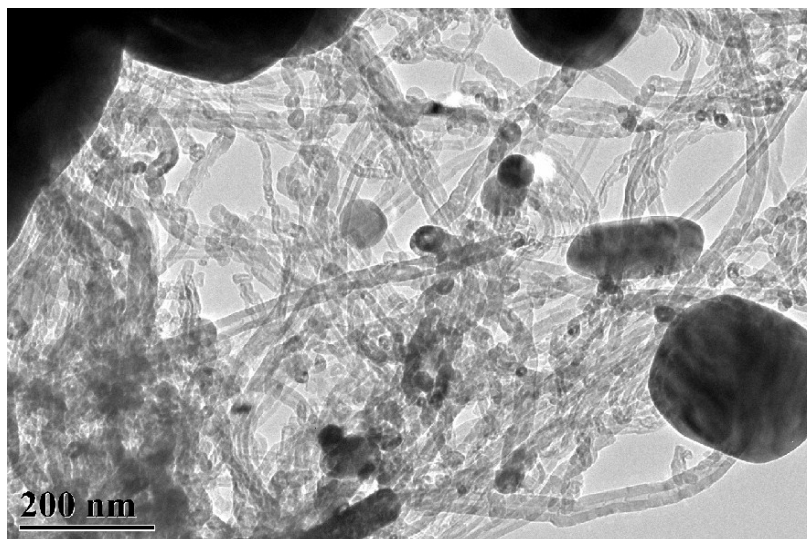

**Figure S2.** TEM image of MWCNTs in the CNT- $\text{TiO}_2$  nanorod composites.

After long time irradiation with the high energy electron beam of TEM, the  $\text{TiO}_2$  nanorods were melted. MWCNTs embedded in the nanocomposites can be clearly seen in the TEM image.

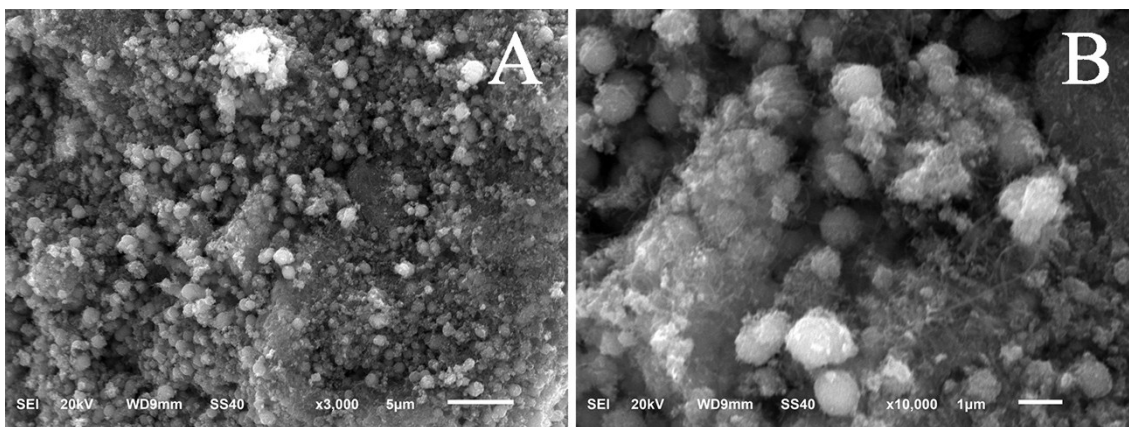

**Figure S3.** SEM images of  $\text{TiO}_2$ -CNT nanocomposites. The reaction system consists of 10 mL of water, 7.0 mg CNT, 1 mL of 37 wt.% HCl and 500  $\mu\text{L}$  titanium tetrachloride.

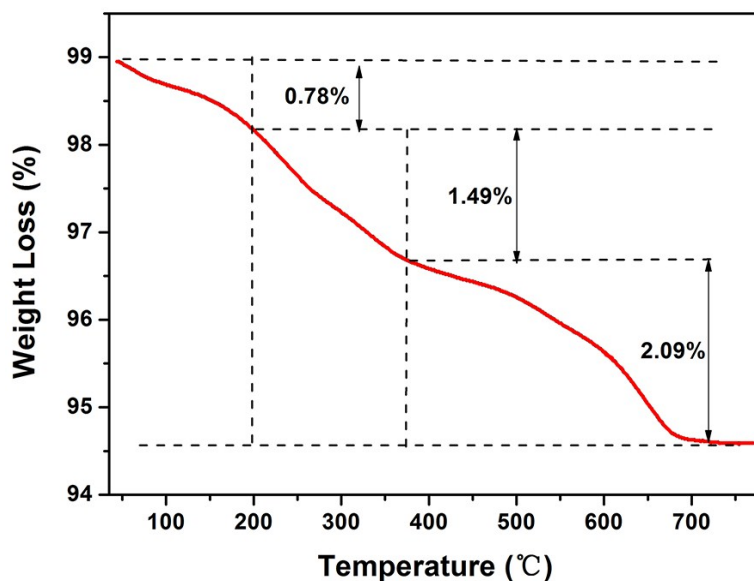

**Figure S4.** TGA curve of the CNT- $\text{TiO}_2$  nanorod composites.

The first decline ends at about 200°C, causing by the evaporation of occluded water. The second reduction from 200 to 380°C mainly attributes to the decomposition of organic molecules. The decomposition of CNT leads to the third weight loss of 2.09%.

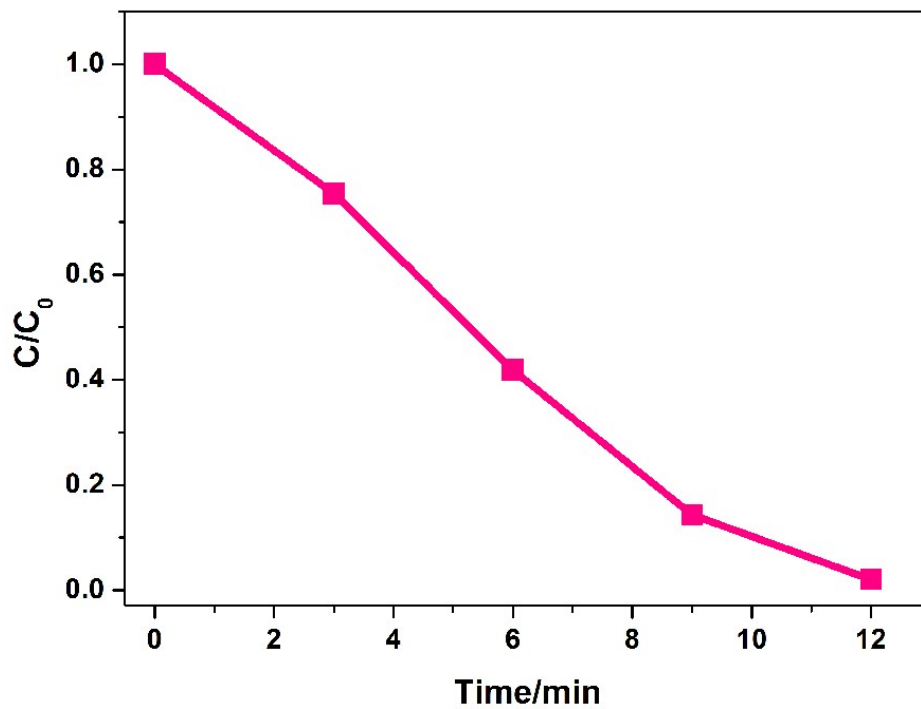

**Figure S5.** Photocatalytic degradation capability of P25 with MB as a model pollutant.

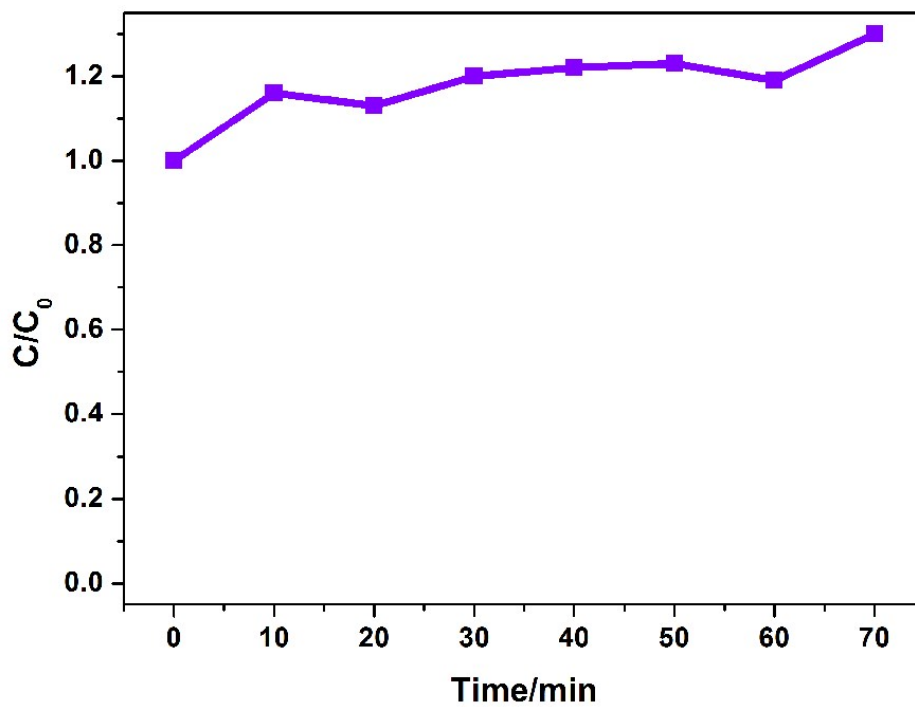

**Figure S6.** MB degradation capability of MWCNTs in dark.

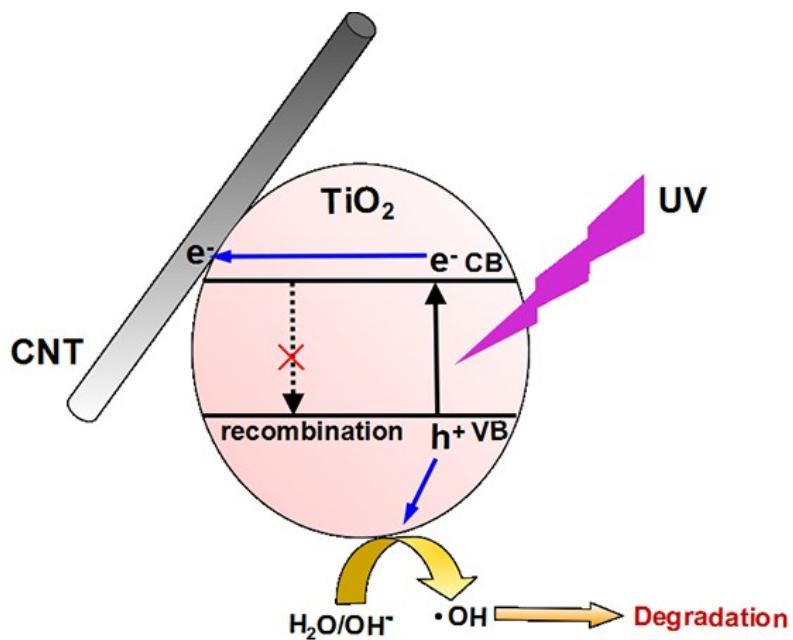

**Figure S7.** Mechanism of the CNT-mediated enhancement of photocatalysis.

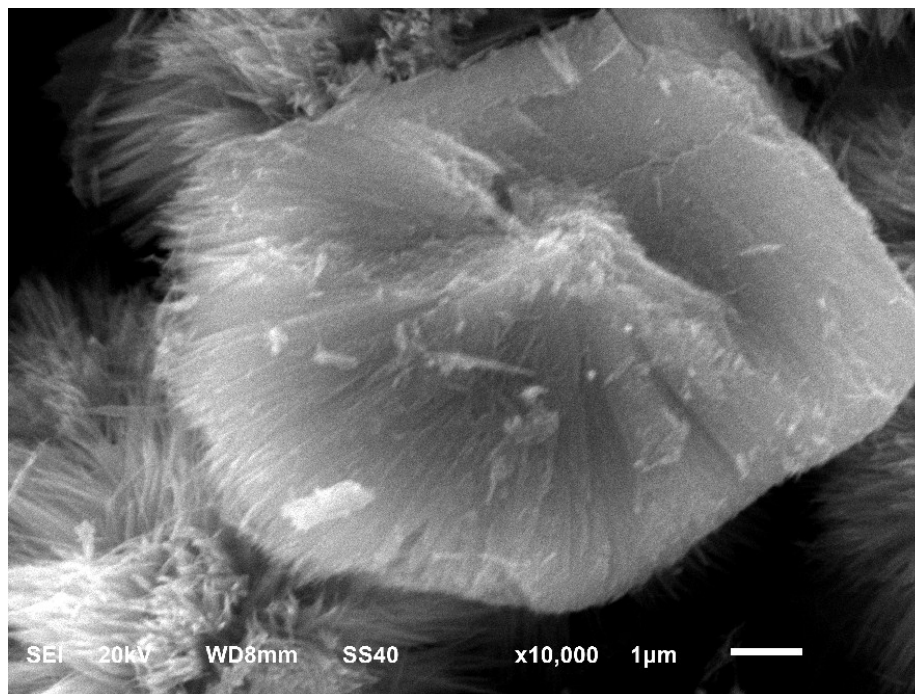

**Figure S8.** SEM section image of the CNT-TiO<sub>2</sub> microspheres.

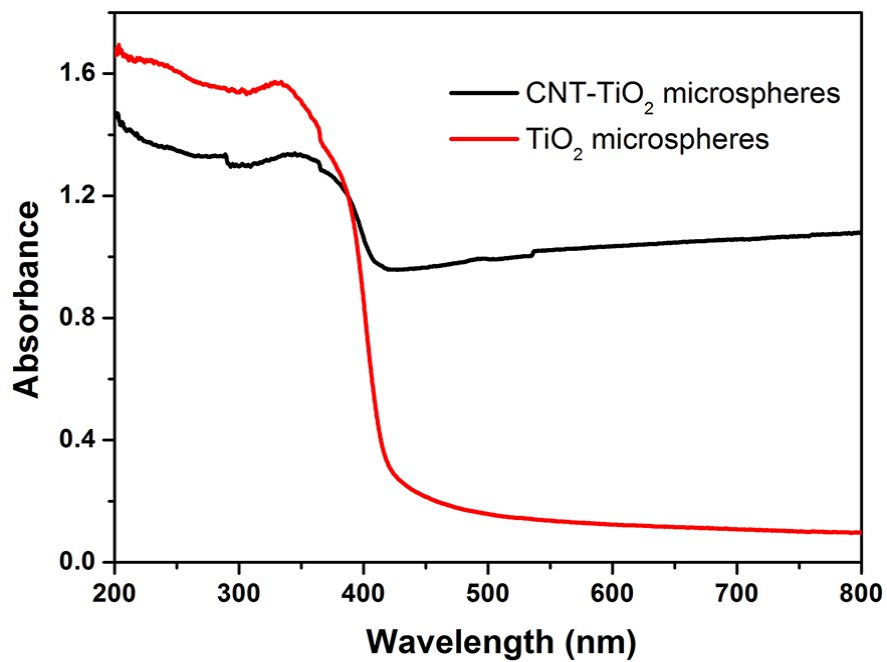

**Figure S9.** UV-Vis diffuse reflectance spectra of the CNT-TiO<sub>2</sub> microspheres and the TiO<sub>2</sub> microspheres.
